# Supplementary material
Source: publisher figshare collection journal article supplement (https://acs.figshare.com/ndownloader/files/4752283)

# **SUPPORTING INFORMATION**

to

## **A Well-Defined Hydrocarbon-Soluble Calcium Hydroxide; Synthesis, Structure and Reactivity**

*Christian Ruspic,<sup>‡</sup> Sharanappa Nembenna,<sup>§</sup> Anja Hofmeister,<sup>§</sup> Jörg Magull,<sup>§</sup>  
Sjoerd Harder,<sup>\*,‡</sup> Herbert W. Roesky<sup>\*,§</sup>*

Anorganische Chemie, Universität Duisburg-Essen, Universitätsstraße 5-7, 45117 Essen,  
Germany, and Institut für Anorganische Chemie, Universität Göttingen, Tammannstrasse 4,  
37077 Göttingen.

**Sol-gel coating and scanning electron microscopy.** A colorless solution of **2** (0.18 M) was charged with carbon dioxide over a period of 10 minutes. Objects were cleaned by flushing with ethanol and air dried. Subsequently, they were dipped 2-3 times in the solution of **2** saturated with CO<sub>2</sub> and, after air-drying, washed with hexane to remove organic residue. The samples were attached to graphite foil by graphite glue and covered with gold by sputtering. The morphologies of the deposited CaCO<sub>3</sub> films were examined by scanning electron microscopy (SEM; ESEM Quanta 400) and the chemical composition was investigated by XRD measurements.

Pictures of sol-gel coated iron wire:

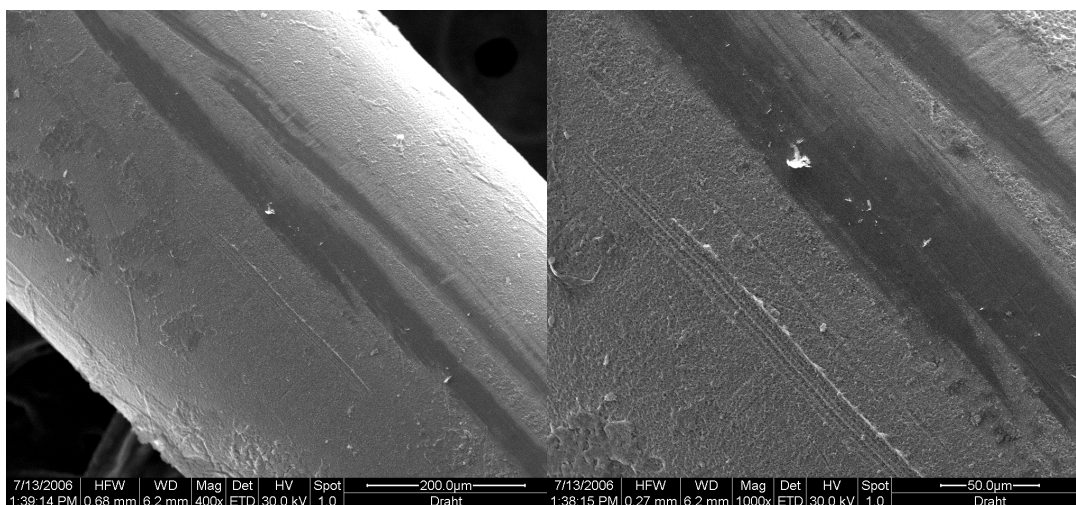

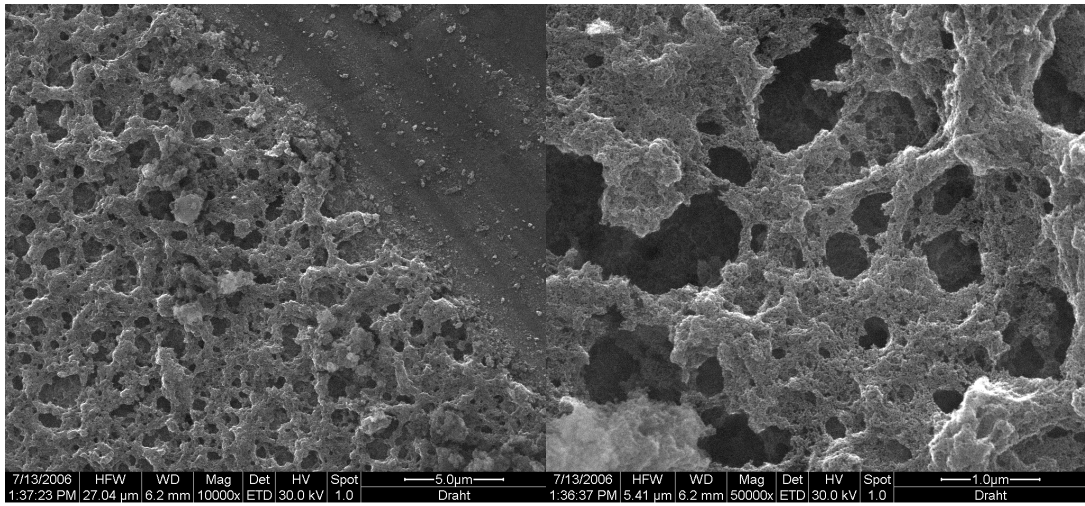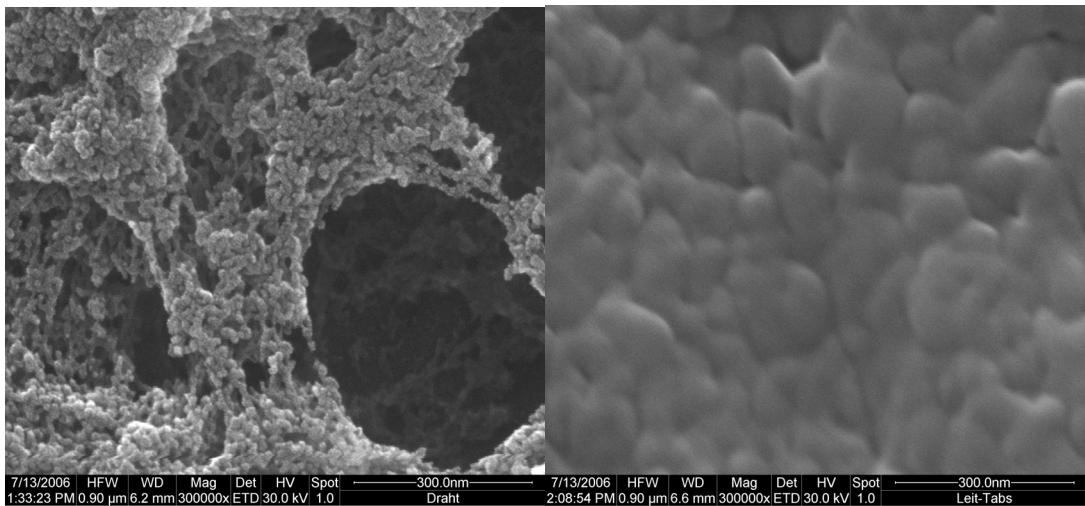

## EDX-spectrum

C:\SharedData\Anorganische Chemie\Iruspic\CaCO3\_EDX2.spc

Label A:

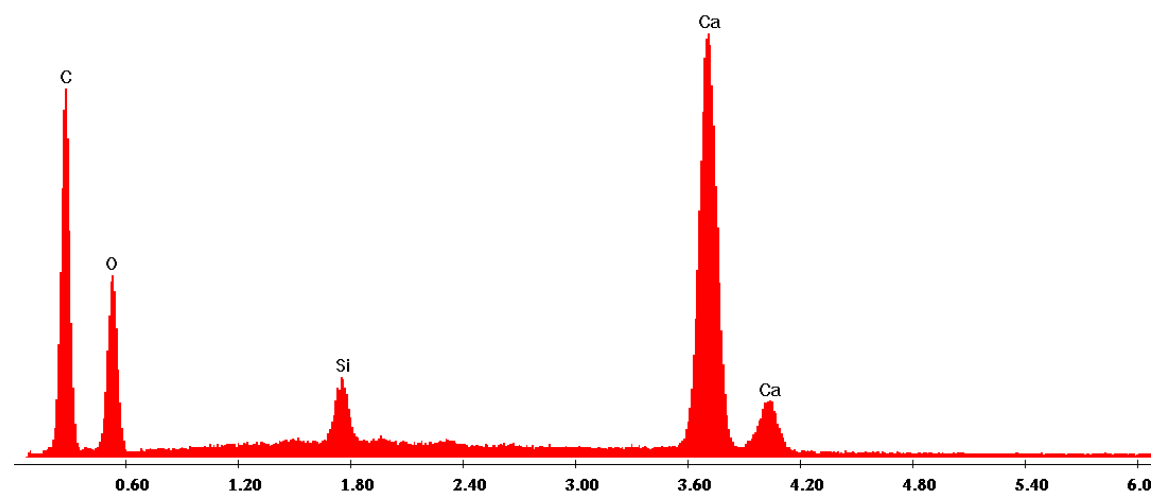

Supplement: Supplementary file 1 [file 4752283]
